1 **Molecular dissection of early defense signaling underlying volatile-mediated**  
2 **defense priming and herbivore resistance in rice**

3

4 Meng Ye<sup>1</sup>, Gaétan Glauser<sup>2</sup>, Yonggen Lou<sup>3</sup>, Matthias Erb<sup>1\*</sup>, Lingfei Hu<sup>1\*</sup>

5

6 <sup>1</sup>Institute of Plant Sciences, University of Bern, Bern 3013, Switzerland

7 <sup>2</sup>Neuchâtel Platform of Analytical Chemistry, University of Neuchâtel, Neuchâtel  
8 2009, Switzerland

9 <sup>3</sup>State Key Laboratory of Rice Biology, Institute of Insect Sciences, Zhejiang University,  
10 Hangzhou 310058, China

11

12 \*Address correspondence to: [lingfei.hu@ips.unibe.ch](mailto:lingfei.hu@ips.unibe.ch); [matthias.erb@ips.unibe.ch](mailto:matthias.erb@ips.unibe.ch)

13

14 **Short title:** Early signaling in volatile priming

15

16

17 **Abstract**

18 Herbivore-induced plant volatiles prime plant defenses and resistance. How volatiles  
19 are integrated into early defense signaling is not well understood. Furthermore, whether  
20 there is a causal relationship between volatile defense priming and herbivore resistance  
21 is unclear. Here, we investigated the impact of indole, a common herbivore-induced  
22 plant volatile and known defense priming cue, on early defense signaling and herbivore  
23 resistance in rice. We show that rice plants infested by *Spodoptera frugiperda*  
24 caterpillars release up to 25 ng\*h<sup>-1</sup>. Exposure to equal doses of synthetic indole  
25 enhances rice resistance to *S. frugiperda*. Screening of early signaling components  
26 reveals that indole directly enhances the expression of the receptor like kinase *OsLRR-*  
27 *RLK1*. Furthermore, indole specifically primes the transcription, accumulation and  
28 activation of the mitogen-activated protein kinase *OsMPK3* as well as the expression  
29 of the downstream WRKY transcription factor *OsWRKY70* and several jasmonate  
30 biosynthesis genes, resulting in a higher accumulation of jasmonic acid (JA). Using  
31 transgenic plants defective in early signaling, we show that *OsMPK3* is required, and  
32 that *OsMPK6* and *OsWRKY70* contribute to indole-mediated defense priming of JA-  
33 dependent herbivore resistance. We conclude that volatiles can increase herbivore  
34 resistance of plants by priming early defense signaling components.

35

36 **Keywords**

37 Indole; jasmonic acid; mitogen-activated protein kinase; plant herbivore interactions;  
38 priming; plant defense; rice, volatile; WRKY.

## 39 **Introduction**

40 Plants that are under attack by insect herbivores emit specific blends of herbivore-  
41 induced plant volatiles (HIPVs). HIPVs can prime intact plant tissues to respond faster  
42 and/or stronger to subsequent herbivore attack (Ton et al., 2007; Kim and Felton, 2013;  
43 Balmer et al., 2015; Erb et al., 2015; Mauch-Mani et al., 2017) and may thereby act as  
44 within-plant defense signals that overcome vascular constraints (Frost et al., 2007; Heil  
45 and Silva Bueno, 2007).

46 HIPVs can prime plants to the accumulation of jasmonate defense regulators. Maize  
47 (*Zea mays*) HIPVs such as indole prime jasmonic acid (JA) accumulation and the  
48 transcription of jasmonate-responsive genes (Ton et al., 2007; Erb et al., 2015).  
49 Similarly, green leaf volatiles (GLVs) such as (*Z*)-3-hexenyl acetate prime JA  
50 production in maize (Engelberth et al., 2004) and hybrid poplar (*Populus deltoides* ×  
51 *nigra*) (Frost et al., 2008). As jasmonates are important regulators of plant defense and  
52 herbivore resistance (Howe and Jander, 2008), and several HIPVs prime jasmonates, it  
53 is generally assumed that HIPVs increase plant resistance by priming the jasmonate  
54 pathway (Engelberth et al., 2004; Ameye et al., 2015). However, this connection has  
55 never been directly tested. Recent work shows that some HIPVs can also increase plant  
56 resistance directly by being absorbed and transformed into toxins (Sugimoto et al.,  
57 2014). Thus, the relative importance of HIPV-mediated defense priming for herbivore  
58 resistance remains unclear.

59 To date, several HIPV priming cues have been identified, and their impact on early  
60 defense signaling has been investigated (Shulaev et al., 1997; Engelberth et al., 2013;  
61 Erb et al., 2015). In maize, (*Z*)-3-hexenol increases the expression of *WRKY12* and  
62 *MAPK6*, which are likely involved in transcriptional defense regulation. The same  
63 volatile also activates putative JA biosynthesis genes such as *AOS* and *LOX5*  
64 (Engelberth et al., 2013). In *Arabidopsis thaliana*, (*E*)-2-hexenal induces the expression  
65 of *WRKY40* and *WRKY6* (Mirabella et al., 2015). *WRKY40* and *WRKY6* regulate  $\gamma$ -  
66 amino butyric acid (GABA) metabolism, which mediates GLV-induced root growth  
67 suppression in a JA-independent manner (Mirabella et al., 2008). Despite these  
68 promising results, how HIPVs are integrated into early defense signaling to regulate

69 JA-dependent defenses remains unclear.

70 We recently identified indole as an herbivore-induced volatile within-plant signal that  
71 primes JA and is required for the systemic priming of monoterpenes in maize (Erb et  
72 al., 2015). Indole also primes volatiles in cotton, suggesting that it is active across  
73 different plant species (Erb et al., 2015). Indole can furthermore interact with (Z)-3-  
74 hexenyl acetate to increase JA signaling and herbivore resistance (Hu et al., under  
75 review). Indole exposure also directly increases the mortality of early instar *Spodoptera*  
76 *littoralis* caterpillars by approx. 10% (Veyrat et al., 2016) and renders caterpillars  
77 more resistant and less attractive to parasitoids (Ye et al., 2018). To understand if and  
78 how indole is integrated into early defense signaling, we studied its role on rice. Rice  
79 is a useful model, as several key players in early defense signaling have been identified,  
80 including receptor-like kinases (Ye, 2016; Hu et al., 2018), mitogen-activated protein  
81 kinase (MPKs) (Wang et al., 2013; Li et al., 2015; Liu et al., 2018), WRKY transcription  
82 factors (Wang et al., 2007; Hu et al., 2015; Li et al., 2015; Hu et al., 2016; Huangfu et  
83 al., 2016) and jasmonate biosynthesis genes (Zhou et al., 2009; Guo et al., 2014; Hu et  
84 al., 2015). By taking advantage of the available knowledge and molecular resources in  
85 rice, we investigated how indole is integrated into early defense signaling, and to what  
86 extent this integration translates into enhanced herbivore resistance.

87

## 88 **Results**

### 89 **Caterpillar-induced indole increases herbivore resistance**

90 To determine whether caterpillar attack induces the release of indole in rice, we infested  
91 rice plants with *Spodoptera frugiperda* caterpillars and measured indole release rates  
92 12 - 20 h after the beginning of the attack. Indole emissions increased with the severity  
93 of *S. frugiperda* attack and ranged from 9 to 25 ng h<sup>-1</sup> per plant (Figure 1A-C). Based  
94 on these results, we calibrated capillary dispensers to release indole at a physiologically  
95 relevant rate of 21 ng h<sup>-1</sup> (Figure 1C) and exposed rice plants to individual dispensers  
96 for 12 h. We then added *S. frugiperda* larvae to control and indole-exposed plants and  
97 measured larval weight gain and plant damage. Indole pre-exposure significantly  
98 reduced larval damage and weight gain (Figure 1D, E). Thus, physiologically relevant

99 concentrations of indole are sufficient to increase rice resistance against a chewing  
100 herbivore.

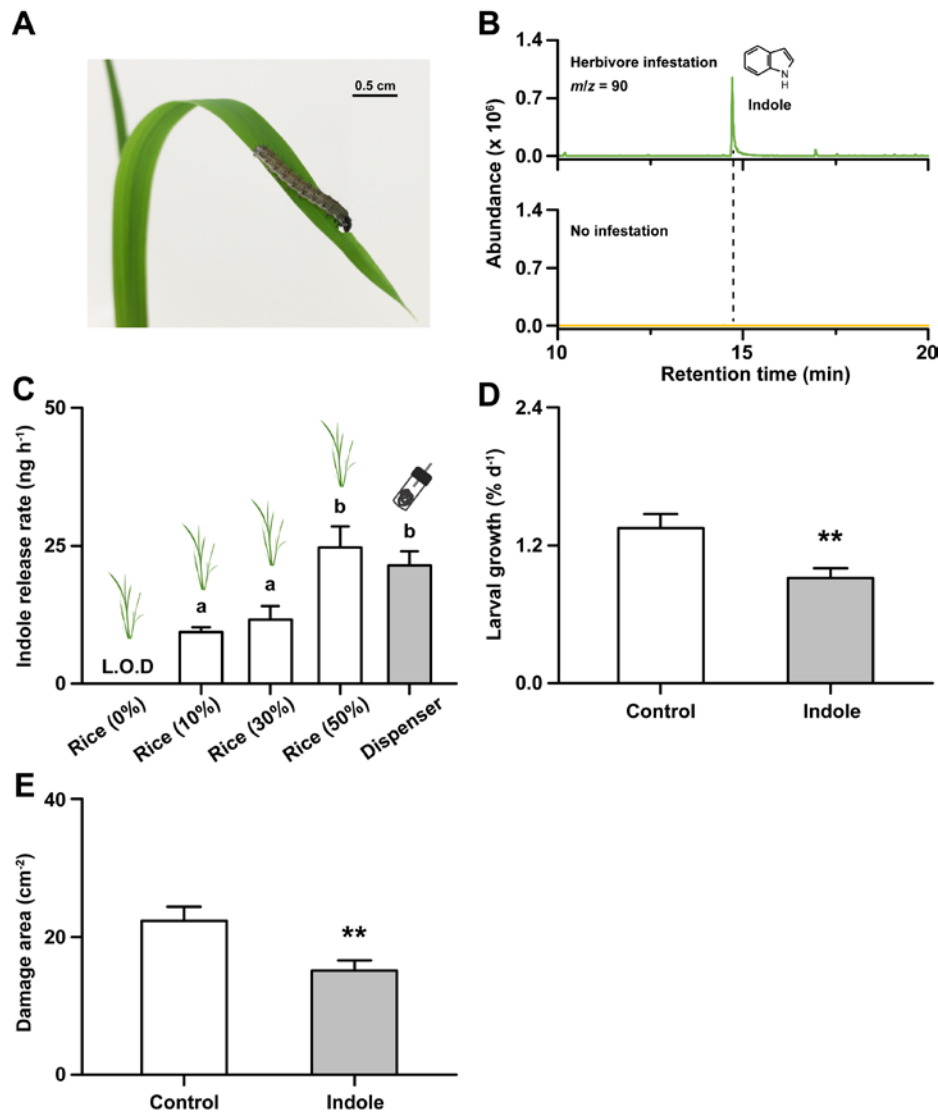

101

102 **Figure 1.** Indole is an herbivore-induced plant volatile that increases rice resistance to *Spodoptera*  
103 *frugiperda* larvae at physiological doses. **(A)** An *S. frugiperda* caterpillar feeding on a rice leaf. **(B)**  
104 Extracted ion chromatograms of GC/MS headspace analyses of control and *S. frugiperda* infested  
105 rice leaves.  $m/z = 90$  corresponds to a characteristic fragment of indole. **(C)** Emission rates of indole  
106 from rice plants that are attacked by different densities of *S. frugiperda* caterpillars. The percentage  
107 of consumed leaf area relative to total leaf area is indicated on the x-axis (+SE,  $n=6-8$ ). The release  
108 of synthetic indole by custom-made capillary dispensers is shown for comparison. Letters indicate  
109 significant differences between treatments ( $P < 0.05$ , one-way ANOVA followed by multiple  
110 comparisons through FDR-corrected LSMeans). L.O.D., below limit of detection. **(D)** Average  
111 growth rate of *S. frugiperda* caterpillars feeding on rice plants that were pre-exposed to indole  
112 dispensers releasing indole at approx. 21 ng h<sup>-1</sup> or control dispensers for 12 h prior to infestation  
113 (+SE,  $n=15$ ). **(E)** Average consumed leaf area (+SE,  $n=15$ ). Asterisks indicate significant differences  
114 between the volatile exposure treatments (Student's  $t$ -tests, \*\*,  $P < 0.01$ ).

115 **Indole primes the transcription of early defense signaling genes**

116 To explore the capacity of indole to regulate early defense signaling in rice, we profiled  
117 the expression of known early defense signaling genes (Figure 2A), including two  
118 receptor-like kinases (Ye, 2016; Hu et al., 2018), two MPKs (Wang et al., 2013; Li et  
119 al., 2015), seven WRKY transcription factors (Qiu et al., 2008; Koo et al., 2009; Li,  
120 2012; Han et al., 2013; Hu et al., 2015; Li et al., 2015; Huangfu et al., 2016) and five  
121 jasmonate biosynthesis genes (Figure 2A) (Zhou et al., 2009; Fukumoto et al., 2013;  
122 Guo et al., 2014; Hu et al., 2015). Control plants and plants that were pre-exposed to  
123 indole for 12 h were measured 0 min, 90 min and 360 min after simulated herbivore  
124 attack to capture both direct induction and priming. Herbivory was simulated by  
125 wounding the leaves and adding *S. frugiperda* oral secretions (OS) as described (Erb et  
126 al., 2009; Fukumoto et al., 2013; Chuang et al., 2014). The expression of *OsLRR-RLK1*,  
127 a receptor like kinase that regulates herbivore resistance (Hu et al., 2018), was directly  
128 induced by indole exposure and expressed at higher levels 90 minutes after simulated  
129 herbivore attack (Figure 2B). The transcription of *OsMPK3*, an MPK which acts  
130 downstream of *OsLRR-RLK1* to regulate herbivore-induced defense and resistance  
131 (Wang et al., 2013; Hu et al., 2018) was not directly induced by indole, but primed for  
132 higher expression 90 min after simulated *S. frugiperda* attack (Figure 2C). *OsWRKY70*,  
133 which is a positive regulator of herbivore-induced defense and acts downstream of  
134 *OsMPK3* (Li et al., 2015), was primed in a similar manner (Figure 2D). Three jasmonate  
135 biosynthesis genes, *OsAOS1*, *OsAOC* and *OsOPR3* were equally primed by indole 90  
136 minutes after elicitation (Figure 2E). By contrast, *OsHI-RLK2*, *OsMPK6*, *OsWRKY13*,  
137 *OsWRKY24*, *OsWRKY30*, *OsWRKY33*, *OsWRKY45*, *OsWRKY53* and the jasmonate  
138 biosynthesis genes *OsHI-LOX* and *OsJAR1* did not respond to indole pretreatment  
139 (Figure 2B-E). Thus, indole increases the expression of a specific subset of early  
140 defense signaling genes upstream of JA biosynthesis.

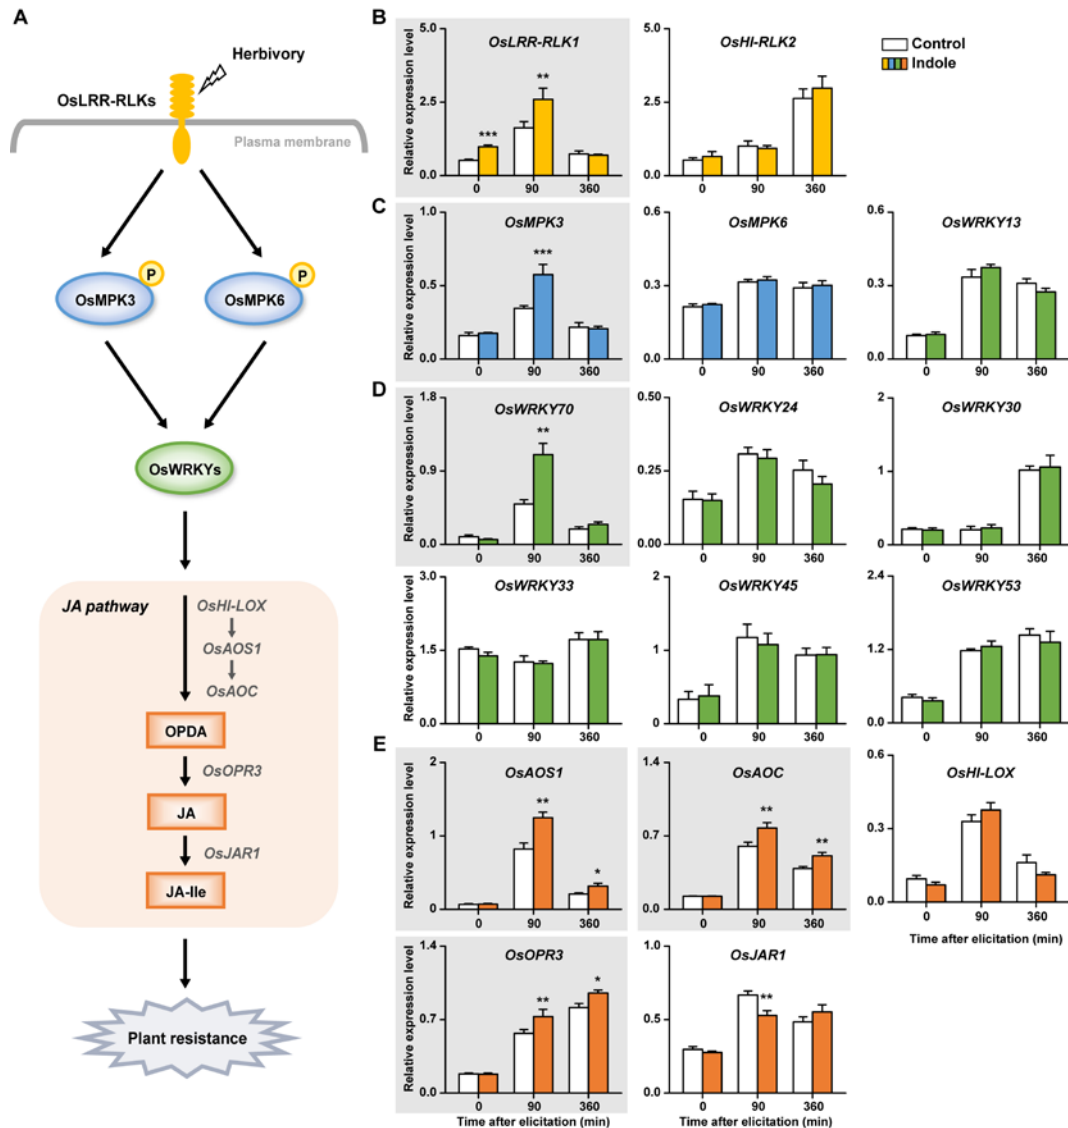

141

142 **Figure 2.** Indole primes early defense signaling genes. **(A)** Current model of herbivory-induced  
 143 defense signaling in rice, including leucine-rich repeat receptor-like kinases (LRR-RLKs), mitogen-  
 144 activated protein kinases (MPKs), WRKY transcription factors, jasmonate biosynthesis genes and  
 145 oxylipins. **(B – E)** Effect of indole pre-treatment on the expression of genes coding for the different  
 146 early signaling steps at different time points after elicitation by wounding and application of  
 147 *Spodoptera frugiperda* oral secretions (+SE, n=4-6). OPDA, 12-oxophytodienoic acid; JA, jasmonic  
 148 acid; JA-Ile, JA-isoleucine. Asterisks indicate significant differences between volatile exposure  
 149 treatments at different time points (two-way ANOVA followed by pairwise comparisons through  
 150 FDR-corrected LSMeans; \*,  $P < 0.05$ ; \*\*,  $P < 0.01$ ; \*\*\*,  $P < 0.001$ ). Genes responding to indole  
 151 are highlighted in gray.

152

### 153 Indole primes OsMPK3 accumulation and activation

154 To determine whether transcriptional priming of MPKs is also reflected in protein  
 155 abundance, we performed western blots using OsMPK3 and OsMPK6-specific  
 156 antibodies. Protein accumulation of OsMPK3 was primed by indole, leading to higher



157 OsMPK3 abundance 90 min after elicitation (Figure 3A). OsMPK6 accumulation was  
158 not altered by indole pre-treatment (Figure 3B). To further investigate whether indole  
159 pretreatment increases OsMPK3 activation, we measured OsMPK3 phosphorylation by  
160 immunoblot analysis using an anti-phosphoERK1/2 (anti-pTEpY) antibody that  
161 interacts with doubly phosphorylated (activated) MPK3 and MPK6 (Segui-Simarro et  
162 al., 2005; Anderson et al., 2011; Schwessinger et al., 2015). Indole primed OsMPK3  
163 activation 90 min after elicitation (Figure 3C). We also detected a slightly higher  
164 activation of OsMPK6 (Figure 3C). Thus, indole exposures primes the accumulation  
165 and activation of MPKs involved in defense regulation.

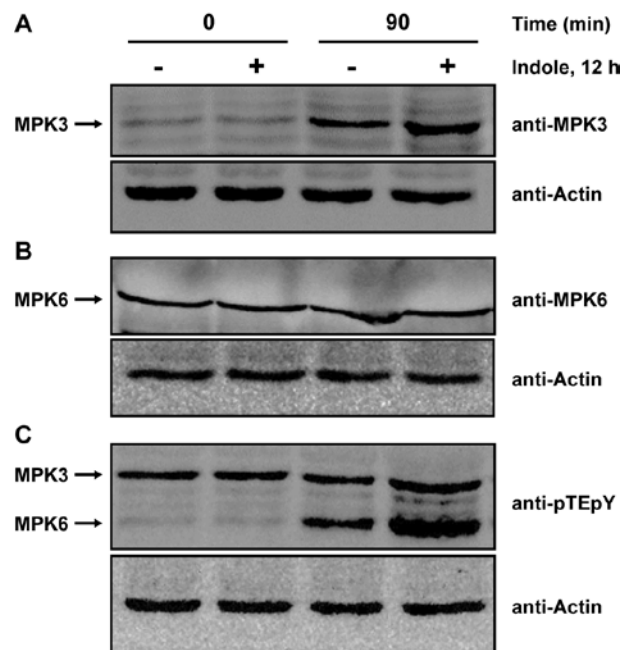

166  
167 **Figure 3.** Indole primes OsMPK3 accumulation and activation. (A – C) Herbivore-elicited protein  
168 accumulation and activation of OsMPK3 and OsMPK6 with (+) or without (-) indole exposure for  
169 12 h. Leaves from 6 replicate plants were harvested at indicated times after elicitation.  
170 Immunoblotting was performed using an anti-MPK3 antibody for OsMPK3 (A), an anti-MPK6  
171 antibody to for OsMPK6 (B), an anti-pTEpY antibody to detect phosphorylated MPKs (C), or an  
172 actin antibody as a loading control. Actin was measured on a replicate blot. This experiment was  
173 repeated two times with similar results.

174

### 175 **Indole induces OPDA and primes JA**

176 To investigate whether the activation of early defense signaling components is  
177 associated with higher accumulation of stress-related phytohormones, we quantified  
178 12-oxophytodienoic acid (OPDA), JA and JA-isoleucine (JA-Ile), abscisic acid (ABA)  
179 and salicylic acid (SA) in indole-exposed and control plants (Figure 4).



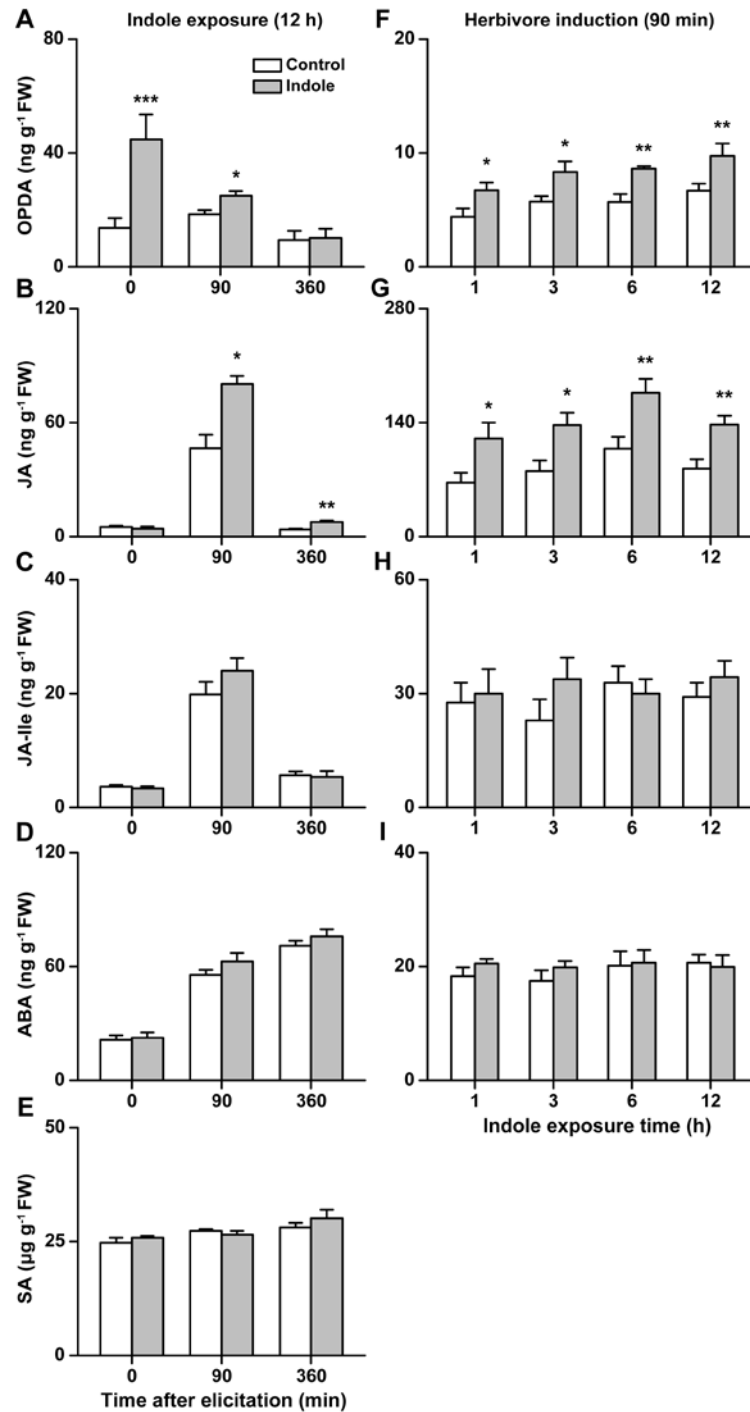

180

181 **Figure 4.** Indole induces 12-oxophytodienoic acid (OPDA) and primes jasmonic acid (JA)  
 182 accumulation. (A – E) Average concentrations of (A) OPDA, (B) JA, (C) JA-isoleucine (JA-Ile),  
 183 (D) abscisic acid (ABA) and (E) salicylic acid (SA) in indole- and control-exposed rice plants at  
 184 different time points after elicitation (+SE,  $n=5-6$ ). Plants were exposed to indole for 12 h before  
 185 elicitation. (F – I) Average concentrations of OPDA, JA, JA-Ile and ABA in rice plants that were  
 186 exposed to indole for 1 h, 3 h, 6 h or 12 h or control dispensers 90 min after elicitation (+SE,  $n=5-6$ ).  
 187 SA levels were not measured in this experiment. Asterisks indicate significant differences  
 188 between treatments (two-way ANOVA followed by pairwise comparisons through FDR-corrected  
 189 LSMMeans; \*,  $P < 0.05$ ; \*\*,  $P < 0.01$ ; \*\*\*,  $P < 0.001$ ).

190 Indole exposure increased the accumulation of OPDA before and after elicitation  
191 (Figure 4A). JA concentrations were increased in indole-exposed plants 90 and 360 min  
192 after elicitation (Figure 4B). The levels of JA-Ile, SA and ABA were not affected by  
193 indole pre-exposure (Figure 4C-E). To test the total dose of indole that is required for  
194 the priming of phytohormones, we exposed rice plants to indole dispensers for 1-12 h  
195 and measured hormone accumulation 90 minutes after elicitation. Exposure to indole  
196 dispensers for 1 h (resulting in a total release of 21 ng from the dispensers) was  
197 sufficient to increase OPDA and JA levels. Longer exposure did not significantly  
198 increase OPDA and JA responses. Thus, exposure of rice plants to 21 ng of indole over  
199 1 h is sufficient to increase the production of oxylipin defense regulators.

200

### 201 **OsMPK3 is required for indole-elicited JA priming and herbivore resistance**

202 To understand whether the early signaling components that are responsive to indole are  
203 required for downstream responses, we measured JA priming and herbivore resistance  
204 in control- and indole-exposed wild type and transgenic plants, including the *OsLRR-*  
205 *RLK1*-silenced line *ir-lrr1* (Hu et al., 2018), the *OsMPK3*- and *OsMPK6*-silenced lines  
206 *ir-mpk3* and *ir-mpk6* (Wang et al., 2013; Li et al., 2015) and the *OsWRKY70*-silenced  
207 line *ir-wrky70* (Li et al., 2015). *OsLRR-RLK1* silencing did not affect indole-dependent  
208 OPDA induction, JA priming and herbivore growth suppression (Figure 5A). By  
209 contrast, silencing *OsMPK3* completely suppressed indole-dependent OPDA induction,  
210 JA priming and herbivore growth reduction (Figure 5B). The induction of JA by  
211 herbivore elicitation was still clearly visible in *ir-mpk3* plants, demonstrating that the  
212 absence of indole resistance priming is not due to a complete suppression of JA  
213 signaling. Silencing *OsMPK6* reduced indole-dependent JA priming and herbivore  
214 growth suppression by approximately 50%, and led to an almost complete  
215 disappearance of OPDA induction. Silencing *OsWRKY70* also reduced indole-  
216 dependent OPDA induction, priming of JA and herbivore growth suppression by  
217 approximately 50 % (Figure 5C, D). Thus, *OsMPK3* is required, and *OsMPK6* and  
218 *OsWRKY70* contribute to indole defense priming.

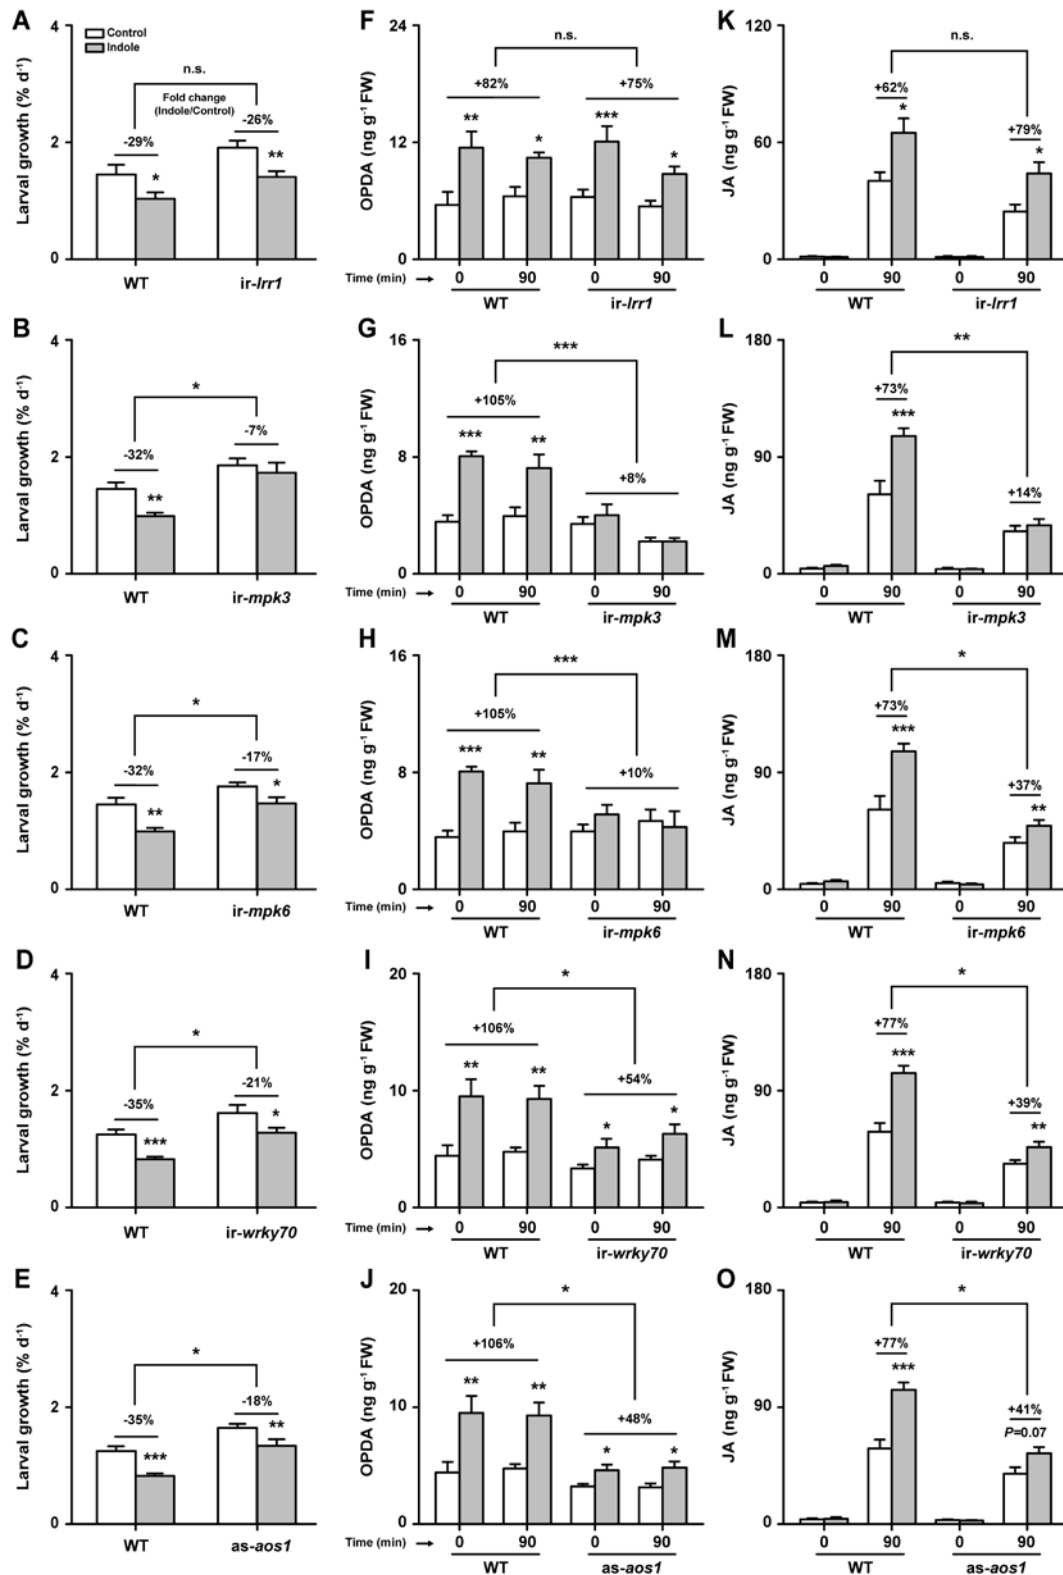

219

220 **Figure 5.** Indole-induced priming of jasmonic acid and herbivore resistance depends on OsMMPK3.  
 221 (A – E) Average growth rate of *Spodoptera frugiperda* caterpillars feeding on (A) *ir-lrr1*, (B) *ir-*  
 222 *mpk3*, (C) *ir-mpk6*, (D) *ir-wrky70*, (E) *as-aos1* lines and wild-type (WT) plants that were pre-  
 223 exposed to indole or control (+SE, n=15). (F – J) Average concentrations of herbivore-induced 12-  
 224 oxophytodienoic acid (OPDA) in the different transgenic lines and WT plants that were pre-exposed  
 225 to indole or control dispensers (+SE, n=6). (K – O) Average concentrations of herbivore-induced

226 jasmonic acid (JA) in the different transgenic lines and WT plants that were pre-exposed to indole  
227 or control dispensers (+SE,  $n=6$ ). Note that WT, *ir-mpk3* and *ir-mpk6* plants as well as WT, *ir-*  
228 *wrky70* and *as-aos1* plants were measured together within the same experiments. The WT data is,  
229 therefore, identical in the respective figures (e.g. same WT data for *ir-mpk3* and *ir-mpk6* figures;  
230 same WT data for *ir-wrky70* and *as-aos1* figures) and shown repeatedly for illustrative purposes.  
231 FW, fresh weight. n.s. not significant. Percentages refer to fold changes of indole-exposed plants  
232 relative to control-exposed plants. Asterisks above bars indicate significant differences between  
233 volatile exposure treatments within the same plant genotype (two-way ANOVA followed by  
234 pairwise comparisons through FDR-corrected LSMeans; \*,  $P < 0.05$ ; \*\*,  $P < 0.01$ ; \*\*\*,  $P < 0.001$ ).  
235 Asterisks above bars represent significant differences between indole-dependent fold changes of  
236 WT and transgenic lines (Student's *t*-tests, \*,  $P < 0.05$ ; \*\*,  $P < 0.01$ ; \*\*\*,  $P < 0.001$ ).

237

### 238 **The jasmonate signaling pathway contributes to indole-induced herbivore** 239 **resistance**

240 To study the connection between the regulation of JA and the decrease in herbivore  
241 performance in indole-exposed plants, we tested *as-aos1* plants, which accumulate  
242 lower levels of jasmonates upon herbivore elicitation (Hu et al., 2015). OPDA,  
243 accumulation, JA priming and herbivore growth suppression were reduced by  
244 approximately 50% in *as-aos1* plants (Figure 5E). Across the different genotypes,  
245 herbivore growth suppression was strongly correlated with OPDA and JA over-  
246 accumulation: Genotypes that responded to indole with stronger OPDA accumulation  
247 and JA priming also reduced larval growth more strongly after pre-exposure (Figure  
248 6A, B). By contrast, JA-Ile did not respond significantly to indole pre-treatment in any  
249 of the measured genotypes (Supplemental Figure 1), and there was no correlation  
250 between indole-effects on JA-Ile and herbivore growth suppression (Figure 6C).  
251 Together, these findings implicate the jasmonate signaling pathway in indole-induced  
252 herbivore resistance.

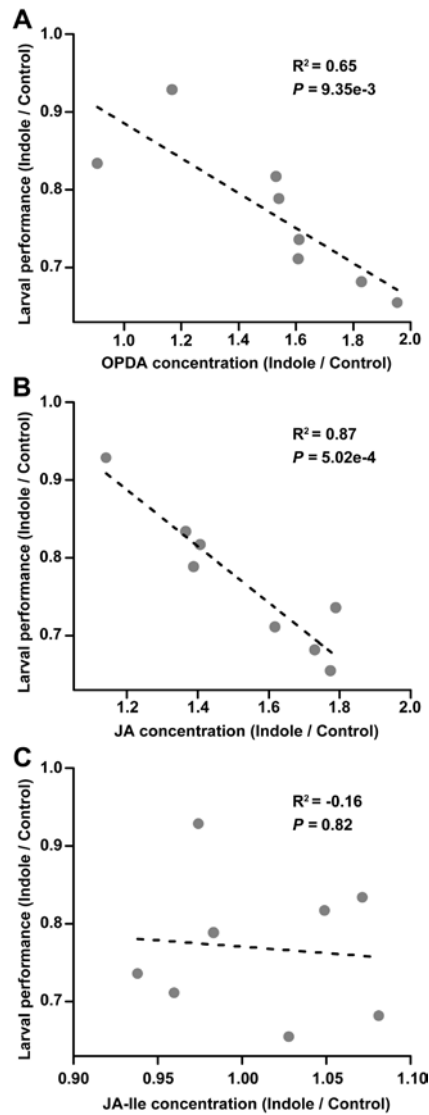

253

254 **Figure 6.** Correlations between indole priming of OPDA, JA and herbivore resistance. (A – C)  
255 Correlations between the fold changes of herbivore-induced (A) 12-oxophytodienoic acid (OPDA),  
256 (B) jasmonic acid (JA), and (C) JA-isoleucine (JA-Ile) concentrations in indole-exposed plants  
257 relative to control-exposed plants and fold changes of *S. frugiperda* larval performance on indole-  
258 exposed plants relative to control-exposed plants. Circles denote individual genotypes.  $R^2$  and  $P$ -  
259 values of Pearson Product-Moment correlations are shown.

260

## 261 Discussion

262 HIPVs can regulate plant defenses and increase herbivore resistance in many different  
263 plant species. However, how volatiles influence early defense signaling, and whether  
264 the resulting increase of defense responsiveness increases herbivore resistance, is not  
265 well understood. This study contributes to filling these gaps of knowledge by  
266 identifying early defense regulators that are involved in volatile defense priming and  
267 plant resistance to herbivory.

268 Indole-exposure at physiological doses resulted in marked changes in the expression of  
269 early defense signaling genes. The receptor-like kinase *OsLRR-RLK1* was directly  
270 induced, while the MPK *OsMPK3* and the WRKY transcription factor *OsWRKY70* were  
271 primed for stronger activation and expression. Experiments with transgenic plants  
272 revealed that *OsMPK3* expression is required, and *OsWRKY70* contributes to indole-  
273 induced downstream responses. As *OsWRKY70* is regulated by and acts downstream of  
274 *OsMPK3* (Li et al., 2015), we infer that indole acts upstream of *OsMPK3*. The fact that  
275 the indole-induced priming was not altered in an *OsLRR-RLK1*-silenced line further  
276 suggests that the expression of this receptor-like kinase, which can regulate *OsMPK3*,  
277 is not directly required for indole-priming. An *OsLRR-RLK1* null mutant would be  
278 required to completely rule out the involvement of this gene in indole-dependent  
279 downstream responses. In maize, GLV exposure has been shown to directly increase  
280 the expression of *MAPK6* and *WRKY12* (Engelberth et al., 2013). In contrast, we find  
281 that *OsMPK3* and *OsWRKY70* were not directly induced by indole, and only primed  
282 after subsequent herbivore induction. Our recent work in maize confirmed that GLVs  
283 directly induce defense genes, while indole primes their expression (Hu et al, under  
284 review). Thus, while GLVs and indole both strengthen the jasmonate signaling pathway,  
285 their mode of action and integration into early defense signaling is likely different.

286 Priming mechanisms have been elucidated for non-volatile chemical priming agents. In  
287 Arabidopsis,  $\beta$ -aminobutyric acid (BABA) acts via the aspartyl-tRNA synthetase  
288 IBI1 and induces the expression of a lectin receptor kinase *LecRK-VI.2*, which is in turn  
289 required for BABA-induced priming (Singh et al., 2012; Luna et al., 2014).  
290 Furthermore, thiadiazole-7-carbothioic acid *S*-methyl ester (BTH) treatment increases  
291 mRNA levels and inactive protein levels of MPK3 and MPK6 which are then activated  
292 more strongly upon stress and thereby enhance defense responses (Beckers et al., 2009).  
293 Our work shows that naturally occurring volatiles such as indole act by modulating  
294 similar components of early defense signaling, but in a different manner. For instance,  
295 indole exposure primes MPK activity, but does not directly induce MPK accumulation  
296 (Figure 3). It also induces the transcription of a receptor-like kinase, but this does not  
297 seem to be required to activate downstream responses. We conclude that indole

298 reprograms early signaling through mechanisms that differ from non-volatile chemical  
299 elicitors such as BABA and BTH.

300 Most HIPVs that enhance defenses have also been shown to prime jasmonate  
301 biosynthesis. Indole does the same in maize (Erb et al., 2015) and, as shown here, rice.  
302 Our experiments with transgenic plants show that the priming of JA requires *OsMPK3*  
303 and is enhanced by *OsWRKY70*, both of which are primed by indole-exposure (Figure  
304 5). We thus infer that JA priming results from the modulation of *OsMPK3*-dependent  
305 early defense signaling by volatile indole. As indole-exposure primes JA biosynthesis  
306 genes, the capacity of plants to synthesize JA upon herbivore elicitation is likely  
307 increased through the higher abundance of rate-limiting enzymes (Haga et al., 2008;  
308 Yara et al., 2008; Riemann et al., 2013). *OsAOC*, for instance, which catalyzes allene  
309 oxide to OPDA, is encoded by only a single copy gene, and *OsAOC*-defective rice  
310 plants are jasmonate-deficient (Riemann et al., 2013; Lu et al., 2015). Indole exposure  
311 also directly induces the accumulation of the JA precursor OPDA. In theory, this bigger  
312 pool may increase the formation of JA upon elicitation through the induction of  
313 *OsOPR3* following herbivore attack. However, our experiments show that OPDA  
314 depletion upon elicitation is not strictly required for JA priming. Thus, there is currently  
315 no evidence that direct OPDA induction is causally linked to JA priming in indole-  
316 exposed plants.

317 *OsMPK3*, *OsWRKY70* and JA are part of the same signaling cascade and are positive  
318 regulators of rice resistance to chewing herbivores (Zhou et al., 2009; Wang et al., 2013;  
319 Li et al., 2015). Indole primes these defense signaling components, and silencing their  
320 expression reduces indole-induced resistance against *S. frugiperda*, which illustrates  
321 that indole increases plant resistance by enhancing early defense signaling and JA  
322 biosynthesis. Thus, apart from repelling and intoxicating certain herbivores (Veyrat et  
323 al., 2016), HIPVs suppress herbivore growth and boost plant resistance by enhancing  
324 JA-dependent plant defense responses. A recent study documented that pathogen-  
325 induced pinenes can trigger systemic acquired resistance (SAR), an effect which was  
326 dependent on SA biosynthesis (Riedlmeier et al., 2017). Thus, in analogy to HIPVs,



327 plant volatiles can also trigger resistance against pathogens by enhancing plant defenses  
328 through other phytohormonal signaling pathways.

329 In summary, we propose the following model. Rice leaves that are attacked by  
330 herbivores release the volatile indole. Through as yet unknown perception mechanisms,  
331 indole primes MPKs in non-attacked tissues. When these tissues come under attack,  
332 OsMPK3 is activated more strongly, which boosts downstream responses, including the  
333 transcription of *OsWRKY70* and jasmonate biosynthesis genes, which again results in  
334 an over accumulation of bioactive oxylipins such as OPDA and JA. Enhanced  
335 jasmonate signaling then boosts plant defense responses and thereby reduces herbivore  
336 growth and damage. This study provides a mechanistic basis for the regulatory potential  
337 and mode of action of HIPVs in plant defense priming.

338

## 339 **Material and Methods**

### 340 **Plant and insect resources**

341 The rice (*Oryza sativa*) cultivar Xiushui 110 was used in this study. In addition, the  
342 transgenic line *ir-irr1* and its corresponding wild type line Xiushui 110 as well as the  
343 transgenic lines *ir-mpk3*, *ir-mpk6*, *ir-wrky70*, *as-aos1* and their corresponding wild type  
344 Xiushui 11 were used. These genotypes have been described and characterized  
345 previously (Wang et al., 2013; Hu et al., 2015; Li et al., 2015; Hu et al., 2018). Rice  
346 seeds were pre-germinated, and then sown in plastic pots (11 cm height, 4 cm diameter)  
347 using commercial potting soil (Aussaaterde, Ricoter Erdaufbere-itung AG,  
348 Switzerland). Plants were grown in a greenhouse (26°C ± 2°C, 55% relative humidity,  
349 14:10 h light/dark, 50,000 lm m<sup>-2</sup>). Plants were watered three times per week, and used  
350 for experiments 30 days after sowing. Fall armyworm (*Spodoptera frugiperda*) larvae  
351 were provided by University of Neuchâtel and reared on artificial diet as previously  
352 described (Maag et al., 2014). Oral secretions (OS) were collected from third instar *S.*  
353 *frugiperda* larvae which had been feeding on rice leaves for 48 h, and diluted 1:1 with  
354 sterilized Milli-Q water before use.

355

## 356 **Quantification of herbivore-induced indole**

357 To determine natural emission rates of indole, we infested rice plants with 3, 5 or 8  
358 third-instar *S. frugiperda* larvae for 12 h, resulting in the consumption of approx. 10%,  
359 30% and 50% of total leaf area. Following infestation, volatiles were collected using a  
360 dynamic headspace sampling system and Super-Q traps ( $n=8$ ). Briefly, the rice plants  
361 were enclosed with cooking bags (PET, 35 × 40 cm, max. 200 °C, Migros supermarket,  
362 Switzerland). Purified air from a multiple air-delivery system entered the bags via  
363 Teflon tubing at a rate of 0.7 L min<sup>-1</sup> and was pulled out through the Super-Q trap  
364 (Volatile Collection Trap LLC., UK) at a rate of 0.3 L min<sup>-1</sup>. Before collection, the  
365 Super-Q traps were rinsed with 3 mL of methylene chloride ( $\geq 99.8\%$ , GC, Sigma,  
366 USA). Volatiles were collected for 8 h. After collection, the traps were extracted with  
367 200  $\mu$ L of methylene chloride which contains two internal standards (*n*-octane and  
368 nonyl-acetate, each 1  $\mu$ g in 200  $\mu$ L methylene chloride). Then, a 1  $\mu$ L aliquot of each  
369 sample was injected into GC/MS (Agilent 7820A GC interfaced with an Agilent 5977E  
370 MSD, USA) in pulsed split mode onto an apolar column (HP-5MS, 30 m, 0.25mm ID,  
371 0.25  $\mu$ m film thickness, Alltech Associates, Inc, USA) for analysis. Helium at constant  
372 flow (1 mL min<sup>-1</sup>) was used as carrier gas. After injection, the column temperature was  
373 maintained at 40 °C for 1 min, increased to 250 °C at 6 °C min<sup>-1</sup> followed by a post-  
374 run of 3 min at 250 °C. The quadrupole MS was operated in the electron ionization  
375 mode at 70 eV, a source temperature of 230 °C, quadrupole temperature of 150 °C, with  
376 a continuous scan from  $m/z$  50 to 300. The detector signal was processed with HP GC  
377 Chemstation software. Absolute emission rates of indole were determined by peak areas,  
378 and calculated using a standard curve of synthetic indole ( $>98\%$ , GC, Sigma, USA).

379

## 380 **Indole exposure**

381 To expose rice to synthetic indole, we covered plants of different genotypes individually  
382 with passively ventilated plastic cylinders (40 cm height, 4 cm diameter) made of  
383 transparent plastic sheet (Rosco Laboratories Inc., USA). The plants were placed into  
384 the greenhouse (26 °C  $\pm$  2 °C, 55% relative humidity, 14:10 h light/dark, 50,000 lm m<sup>-2</sup>),  
385 and indole or control dispensers were added into the cylinders. After 12 h of exposure,

386 the cylinders were carefully removed and the plants were subjected to OS elicitation  
387 (see “Plant elicitation” below). Indole and control dispensers were made as described  
388 previously (Erb et al., 2015). Briefly, dispensers consisted of 2 mL amber glass vials  
389 ( $11.6 \times 32 \text{ mm}^2$ ; Sigma) containing 20 mg of synthetic indole (>98%, GC, Sigma,  
390 USA). The vials were closed with open screw caps that contained a PTFE/rubber  
391 septum, which was pierced with a 1  $\mu\text{L}$  micropette (Drummond, Millan SA,  
392 Switzerland). The vials were sealed with parafilm and wrapped in aluminum foil for  
393 heat-protection and to avoid photodegradation. GC/MS analyses using the approach  
394 described above showed that these dispensers release approx.  $21 \text{ ng h}^{-1}$  volatile indole,  
395 which corresponds to amounts emitted by a single rice plant under attack by *S.*  
396 *frugiperda* (Figure 1). Control dispensers consisted of empty glass vials. Dispensers  
397 were prepared 24 h before the start of experiments. As we used a passively ventilated  
398 cylinder system, indole may accumulate at levels that are higher than expected under  
399 natural conditions. To test whether plant defense responses are affected by potential  
400 accumulation over time, we exposed rice plants to dispensers for 1 h, 3 h, 6 h and 12 h  
401 and measured priming of jasmonic acid (JA) as a downstream defense marker (see  
402 sections “plant elicitation” and “phytohormone quantification”). We found that JA  
403 priming is independent of the duration of indole exposure (Figure 4). We therefore  
404 proceeded in using this system and an exposure time of 12 h for the remaining  
405 experiments.

406

#### 407 **Plant elicitation**

408 After indole-exposure, cylinders and dispensers were removed. Maize plants were  
409 elicited by wounding two leaves over an area ( $\sim 0.5 \text{ cm}^2$ ) on both sides of the central  
410 vein with a razor blade, followed by the application of 10  $\mu\text{L}$  of *S. frugiperda* OS. This  
411 treatment results in plant responses similar to real herbivore attack (Erb et al., 2009;  
412 Fukumoto et al., 2013; Chuang et al., 2014). Leaves were then harvested at different  
413 time intervals, and flash frozen for further analysis.

414

### 415 **Herbivore performance**

416 One starved and pre-weighed second instar larva was individually introduced into  
417 cylindrical mesh cages (1 cm height and 5 cm diameter), and clipped on the leaves of  
418 rice plants which were pre-exposed to indole or control. The position of the cages was  
419 moved every day to provide sufficient food for the larvae. Larval mass was determined  
420 7 days after the start of the experiment. To quantify damage, the remaining leaf pieces  
421 were scanned, and the removed leaf area was quantified using Digimizer 4.6.1  
422 (Digimizer) ( $n=15$ ).

423

### 424 **Phytohormone quantification**

425 Rice leaves were harvested at 0, 90 and 360 min after the start of OS elicitation, and  
426 ground in liquid nitrogen ( $n>5$ ). The phytohormones OPDA, JA, JA-Ile, SA, and ABA  
427 were extracted with ethyl acetate spiked with isotopically labeled standards (1 ng for  
428  $d_5$ -JA,  $d_6$ -ABA,  $d_6$ -SA, and  $^{13}C_6$  -JA-Ile) and analyzed with UHPLC-MS/MS as  
429 described (Glauser et al., 2014).

430

### 431 **Gene expression analysis**

432 Quantitative real time PCR (QRT-PCR) was used to measure the expression levels of  
433 different genes. Rice leaves were harvested at 0, 90 and 360 min after the start of OS  
434 elicitation, and ground in liquid nitrogen ( $n>4$ ). Total RNA was isolated from rice  
435 leaves using the GeneJET Plant RNA Purification Kit (Thermo Scientific, USA). One  
436  $\mu$ g of each total RNA sample was reverse transcribed with SuperScript® II Reverse  
437 Transcriptase (Invitrogen, USA) to synthesize cDNA. The QRT-PCR assay was  
438 performed on the LightCycler® 96 Instrument (Roche, Switzerland) using the KAPA  
439 SYBR FAST qPCR Master Mix (Kapa Biosystems, USA). A linear standard curve was  
440 constructed using a serial dilution of cDNA which was pooled from all plants, and  
441 generated by plotting the threshold cycle (Ct) against the  $\log_{10}$  of the dilution factors.  
442 The relative transcript levels of the target genes in samples were determined according  
443 to the standard curve. A rice actin gene *OsACTIN* was used as an internal standard to

444 normalize cDNA concentrations. The primers used for QRT-PCR for all tested genes  
445 are listed in Supplemental Table 1.

446

#### 447 **MPK protein and activation detection**

448 Rice leaves were harvested at 0 and 90 min after the start of OS elicitation, and ground  
449 in liquid nitrogen. Total proteins were extracted from pooled leaves of six replicates at  
450 each time point using the method described (Wu et al., 2007). Forty  $\mu$ g of total proteins  
451 were separated by SDS-PAGE and transferred onto Bio Trace pure nitrocellulose  
452 blotting membrane (Bio-Rad, USA). Immunoblotting was performed using the method  
453 established previously (Hu et al., 2015). The primary antibody anti-MPK3 (Beijing  
454 Protein Innovation, China) or anti-MPK6 (Beijing Protein Innovation, China) was used  
455 to detect the total proteins of OsMPK3 or OsMPK6 respectively. The rabbit monoclonal  
456 anti-phospho-ERK1/2 (anti-pTEpY) antibody (Cell Signaling Technologies, USA),  
457 which is specific for the activated (phosphorylated) form of the p44/42 MPKs  
458 (Thr202/Tyr204) (Segui-Simarro et al., 2005; Anderson et al., 2011) was used to detect  
459 the active OsMPK3 and OsMPK6. The plant-actin rabbit polyclonal antibody (EarthOx,  
460 USA) was used for loading control and detected on a replicate blot. Antigen-antibody  
461 complexes were detected with horseradish peroxidase-conjugated anti-rabbit secondary  
462 antibody (Thermo Scientific, USA) followed by chemiluminescence detection with  
463 Pierce™ ECL Western Blotting Substrate (Thermo Scientific, USA).

464

#### 465 **Statistical analyses**

466 Differences in levels of gene expression and phytohormones were analyzed by analysis  
467 of variance (ANOVA) followed by pairwise comparisons of Least Squares Means  
468 (LSMeans), which were corrected using the False Discovery Rate (FDR) method  
469 (Benjamini and Hochberg, 1995). The data normality was verified by inspecting  
470 residuals using the “plotresid” function of the R package “RVAideMemoire” (Herve,  
471 2015). The variance homogeneity was tested through Shapiro-Wilk's tests using the  
472 “shapiro.test” function in R. Datasets that did not fit assumptions were log- or asinh-  
473 transformed to meet the requirements of normality and equal variance. Differences in

474 larval growth and leaf damage were determined by two sided Student's *t*-tests. The  
475 relative priming intensity was calculated by the fold changes of larval growth, OPDA  
476 or JA levels in the indole-exposed plants relative to control-exposed plants. The  
477 differences in fold changes were compared using Student's *t*-tests. The correlations  
478 (fold changes of OPDA, JA or JA-Ile vs fold changes of larval growth) were tested  
479 through Pearson's product-moment correlation using the "cor. test" function in R (Puth  
480 et al., 2014). All the analyses were conducted using R 3.2.2 (R Foundation for Statistical  
481 Computing, Vienna, Austria).

482

### 483 **Accession Numbers**

484 Sequence data from this article can be found in the Rice Annotation Project under  
485 accession numbers *OsLRR-RLK1* (Os06g47650), *OsHI-RLK2* (Genbank accession  
486 number XM\_015757324), *OsMPK3* (Os03g17700), *OsMPK6* (Os06g06090),  
487 *OsWRKY70* (Os05g39720), *OsWRKY53* (Os05g27730), *OsWRKY45* (Os05g25770),  
488 *OsWRKY33* (Os03g33012), *OsWRKY30* (Os08g38990), *OsWRKY24* (Os01g61080),  
489 *OsWRKY13* (Os01g54600), *OsHI-LOX* (Os08g39840), *OsAOS1* (Os03g55800),  
490 *OsAOC* (Os03g32314), *OsOPR3* (Os08g35740), *OsJAR1* (Os05g50890), and  
491 *OsACTIN* (Os03g50885).

492

### 493 **Supplemental Data**

494 **Supplemental Figure 1.** Herbivore-induced jasmonic acid-isoleucine (JA-Ile) levels in  
495 MPK, WRKY and JA-impaired plants after indole exposure.

496 **Supplemental Table 1.** Primers used for QRT-PCR of target genes.

497

### 498 **Acknowledgements**

499 The study was jointly sponsored by the Swiss National Science Foundation (Grant  
500 155781), the Sino-Swiss Science and Technology Cooperation (Exchange Grant Nr.  
501 EG 03-032016) and the European Research Council (ERC) under the European Union's  
502 Horizon 2020 research and innovation programme (ERC-2016-STG 714239). The  
503 authors declare no conflict of interest.

504

505 **Author Contributions**

506 M. E., Y. L. and L. H. conceived the project. M. E and Y. L. acquired project funding.  
507 L. H., M. Y., Y. L. and M. E. designed research. L. H., M. Y. and G. G. performed  
508 experiments. L. H., M. Y., Y. L. and M. E. analyzed and interpreted data. L. H., M. Y.,  
509 and M. E. prepared and wrote the first draft. All authors read and approved the  
510 manuscript.

511

512 **References**

- 513 **Ameye, M., Audenaert, K., De Zutter, N., Steppe, K., Van Meulebroek, L.,**  
514 **Vanhaecke, L., De Vleeschauwer, D., Haesaert, G., and Smagghe, G.** (2015).  
515 Priming of wheat with the green leaf volatile Z-3-hexenyl acetate enhances  
516 defense against *Fusarium graminearum* but boosts deoxynivalenol production.  
517 *Plant Physiol.* **167**, 1671-1684.
- 518 **Anderson, J.C., Bartels, S., Gonzalez Besteiro, M.A., Shahollari, B., Ulm, R., and**  
519 **Peck, S.C.** (2011). Arabidopsis MAP Kinase Phosphatase 1 (AtMKP1)  
520 negatively regulates MPK6-mediated PAMP responses and resistance against  
521 bacteria. *Plant J.* **67**, 258-268.
- 522 **Balmer, A., Pastor, V., Gamir, J., Flors, V., and Mauch-Mani, B.** (2015). The 'prime-  
523 ome': towards a holistic approach to priming. *Trends Plant Sci.* **20**, 443-452.
- 524 **Beckers, G.J., Jaskiewicz, M., Liu, Y., Underwood, W.R., He, S.Y., Zhang, S., and**  
525 **Conrath, U.** (2009). Mitogen-activated protein kinases 3 and 6 are required for  
526 full priming of stress responses in *Arabidopsis thaliana*. *Plant Cell* **21**, 944-953.
- 527 **Benjamini, Y., and Hochberg, Y.** (1995). Controlling the false discovery rate: a  
528 practical and powerful approach to multiple testing. *J. R. Stat. Soc. Ser. B-Stat.*  
529 *Methodol.* **57**, 289-300.
- 530 **Chuang, W.P., Ray, S., Acevedo, F.E., Peiffer, M., Felton, G.W., and Luthe, D.S.**  
531 (2014). Herbivore cues from the fall armyworm (*Spodoptera frugiperda*) larvae  
532 trigger direct defenses in maize. *Mol. Plant Microbe Interact.* **27**, 461-470.
- 533 **Engelberth, J., Alborn, H.T., Schmelz, E.A., and Tumlinson, J.H.** (2004). Airborne



- 534 signals prime plants against insect herbivore attack. Proc. Natl. Acad. Sci. USA  
535 **101**, 1781-1785.
- 536 **Engelberth, J., Contreras, C.F., Dalvi, C., Li, T., and Engelberth, M.** (2013). Early  
537 transcriptome analyses of *Z-3-hexenol*-treated *Zea mays* revealed distinct  
538 transcriptional networks and anti-herbivore defense potential of green leaf  
539 volatiles. PLoS One **8**, e77465.
- 540 **Erb, M., Veyrat, N., Robert, C.A., Xu, H., Frey, M., Ton, J., and Turlings, T.C.J.**  
541 (2015). Indole is an essential herbivore-induced volatile priming signal in maize.  
542 Nat. Commun. **6**, 6273.
- 543 **Erb, M., Flors, V., Karlen, D., de Lange, E., Planchamp, C., D'Alessandro, M.,**  
544 **Turlings, T.C.J., and Ton, J.** (2009). Signal signature of aboveground-induced  
545 resistance upon belowground herbivory in maize. Plant J. **59**, 292-302.
- 546 **Frost, C.J., Appel, H.M., Carlson, J.E., De Moraes, C.M., Mescher, M.C., and**  
547 **Schultz, J.C.** (2007). Within-plant signalling via volatiles overcomes vascular  
548 constraints on systemic signalling and primes responses against herbivores.  
549 Ecol. Lett. **10**, 490-498.
- 550 **Frost, C.J., Mescher, M.C., Dervinis, C., Davis, J.M., Carlson, J.E., and De Moraes,**  
551 **C.M.** (2008). Priming defense genes and metabolites in hybrid poplar by the  
552 green leaf volatile *cis*-3-hexenyl acetate. New Phytol. **180**, 722-733.
- 553 **Fukumoto, K., Kabir, M.A., Yamashita, Y., Mori, I.C., Matsuura, H., and Galis, I.**  
554 (2013). Response of rice to insect elicitors and the role of OsJAR1 in wound  
555 and herbivory-induced JA-Ile accumulation. J. Integr. Plant Biol. **55**, 775-784.
- 556 **Glauser, G., Vallat, A., and Balmer, D.** (2014). Hormone profiling. Methods Mol. Biol.  
557 **1062**, 597-608.
- 558 **Guo, H., Li, H., Zhou, S., Xue, H., and Miao, X.** (2014). *Cis*-12-oxo-phytodienoic  
559 acid stimulates rice defense response to a piercing-sucking insect. Mol. Plant **7**,  
560 1683-1692.
- 561 **Haga, K., Kiyota, S., Jikumaru, Y., Kamiya, Y., Takano, M., and Iino, M.** (2008).  
562 Functional analysis of a rice allene oxide synthase gene (*OsAOS1*) that  
563 functions for jasmonate biosynthesis. Plant Cell Physiol. Supp. **2008**, 0364-

- 564 0364.
- 565 **Han, M., Ryu, H.S., Kim, C.Y., Park, D.S., Ahn, Y.K., and Jeon, J.S.** (2013).  
566 *OsWRKY30* is a transcription activator that enhances rice resistance to the  
567 *Xanthomonas oryzae* pathovar *oryzae*. *J. Plant Biol.* **56**, 258-265.
- 568 **Heil, M., and Silva Bueno, J.C.** (2007). Within-plant signaling by volatiles leads to  
569 induction and priming of an indirect plant defense in nature. *Proc. Natl. Acad.*  
570 *Sci. USA* **104**, 5467-5472.
- 571 **Herve, M.R.** (2015). Package ‘RVAideMemoire’, diverse basic statistical and graphical  
572 functions. Version 0.9-52 (The Comprehensive R Archive Network (CRAN),  
573 Vienna, Austria). <[https://CRAN.R-](https://CRAN.R-project.org/web/packages/RVAideMemoire/)  
574 [project.org/web/packages/RVAideMemoire/](https://CRAN.R-project.org/web/packages/RVAideMemoire/)>.
- 575 **Howe, G.A., and Jander, G.** (2008). Plant immunity to insect herbivores. *Annu. Rev.*  
576 *Plant Biol.* **59**, 41-66.
- 577 **Hu, L., Ye, M., and Erb, M.** Integration of two herbivore-induced plant volatiles  
578 results in synergistic defense priming and enhanced resistance. (Under review).
- 579 **Hu, L., Ye, M., Li, R., and Lou, Y.** (2016). *OsWRKY53*, a versatile switch in  
580 regulating herbivore-induced defense responses in rice. *Plant Signal. Behav.* **11**,  
581 e1169357.
- 582 **Hu, L., Ye, M., Kuai, P., Ye, M., Erb, M., and Lou, Y.** (2018). *OsLRR - RLK1*, an  
583 early responsive leucine - rich repeat receptor - like kinase, initiates rice  
584 defense responses against a chewing herbivore. *New Phytol.* **219**, 1097-1111.
- 585 **Hu, L., Ye, M., Li, R., Zhang, T., Zhou, G., Wang, Q., Lu, J., and Lou, Y.** (2015).  
586 The rice transcription factor *WRKY53* suppresses herbivore-induced defenses  
587 by acting as a negative feedback modulator of mitogen-activated protein kinase  
588 activity. *Plant Physiol.* **169**, 2907-2921.
- 589 **Huangfu, J., Li, J., Li, R., Ye, M., Kuai, P., Zhang, T., and Lou, Y.** (2016). The  
590 transcription factor *OsWRKY45* negatively modulates the resistance of rice to  
591 the brown planthopper *Nilaparvata lugens*. *Int. J. Mol. Sci.* **17**, 697.
- 592 **Kim, J., and Felton, G.W.** (2013). Priming of antiherbivore defensive responses in  
593 plants. *Insect Sci.* **20**, 273-285.

- 594 **Koo, S.C., Moon, B.C., Kim, J.K., Kim, C.Y., Sung, S.J., Kim, M.C., Cho, M.J.,**  
595 **and Cheong, Y.H.** (2009). OsBWMK1 mediates SA-dependent defense  
596 responses by activating the transcription factor OsWRKY33. *Biochem. Biophys.*  
597 *Res. Commun.* **387**, 365-370.
- 598 **Li, R.** (2012). Function characterization of herbivore resistance-related genes  
599 *OsWRKY24*, *OsWRKY70* and *OsNPR1* in rice. In Zhejiang University, China.  
600 (Hangzhou, China: Zhejiang University,), pp. 74-84.
- 601 **Li, R., Zhang, J., Li, J., Zhou, G., Wang, Q., Bian, W., Erb, M., and Lou, Y.** (2015).  
602 Prioritizing plant defence over growth through WRKY regulation facilitates  
603 infestation by non-target herbivores. *eLife* **4**, e04805.
- 604 **Liu, X., Li, J., Xu, L., Wang, Q., and Lou, Y.** (2018). Expressing *OsMPK4* impairs  
605 plant growth but enhances the resistance of rice to the striped stem borer *Chilo*  
606 *suppressalis*. *Int. J. Mol. Sci.* **19**, 1182.
- 607 **Lu, J., Robert, C.A.M., Riemann, M., Cosme, M., Mene-Saffrane, L., Massana, J.,**  
608 **Stout, M.J., Lou, Y., Gershenzon, J., and Erb, M.** (2015). Induced jasmonate  
609 signaling leads to contrasting effects on root damage and herbivore performance.  
610 *Plant Physiol.* **167**, 1100-1116.
- 611 **Luna, E., Van Hulten, M., Zhang, Y., Berkowitz, O., López, A., Pétriacq, P.,**  
612 **Sellwood, M.A., Chen, B., Burrell, M., and Van De Meene, A.** (2014). Plant  
613 perception of  $\beta$ -aminobutyric acid is mediated by an aspartyl-tRNA synthetase.  
614 *Nat. Chem. Biol.* **10**, 450.
- 615 **Maag, D., Dalvit, C., Thevenet, D., Kohler, A., Wouters, F.C., Vassao, D.G.,**  
616 **Gershenzon, J., Wolfender, J.L., Turlings, T.C.J., Erb, M., and Glauser, G.**  
617 (2014). 3- $\beta$ -D-Glucopyranosyl-6-methoxy-2-benzoxazolinone (MBOA-N-Glc)  
618 is an insect detoxification product of maize 1,4-benzoxazin-3-ones.  
619 *Phytochemistry* **102**, 97-105.
- 620 **Mauch-Mani, B., Baccelli, I., Luna, E., and Flors, V.** (2017). Defense priming: An  
621 adaptive part of induced resistance. *Annu. Rev. Plant Biol.* **68**, 485-512.
- 622 **Mirabella, R., Rauwerda, H., Struys, E.A., Jakobs, C., Triantaphylides, C., Haring,**  
623 **M.A., and Schuurink, R.C.** (2008). The *Arabidopsis her1* mutant implicates

- 624 GABA in *E*-2-hexenal responsiveness. *Plant J.* **53**, 197-213.
- 625 **Mirabella, R., Rauwerda, H., Allmann, S., Scala, A., Spyropoulou, E.A., de Vries,**  
626 **M., Boersma, M.R., Breit, T.M., Haring, M.A., and Schuurink, R.C.** (2015).  
627 WRKY40 and WRKY6 act downstream of the green leaf volatile *E*-2-hexenal  
628 in *Arabidopsis*. *Plant J.* **83**, 1082-1096.
- 629 **Puth, M.-T., Neuhäuser, M., and Ruxton, G.D.** (2014). Effective use of Pearson's  
630 product–moment correlation coefficient. *Anim. Behav.* **93**, 183-189.
- 631 **Qiu, D., Xiao, J., Xie, W., Liu, H., Li, X.H., Xiong, L., and Wang, S.** (2008). Rice  
632 gene network inferred from expression profiling of plants overexpressing  
633 OsWRKY13, a positive regulator of disease resistance. *Mol. Plant* **1**, 538-551.
- 634 **Riedlmeier, M., Ghirardo, A., Wenig, M., Knappe, C., Koch, K., Georgii, E., Dey,**  
635 **S., Parker, J.E., Schnitzler, J.P., and Vlot, A.C.** (2017). Monoterpenes support  
636 systemic acquired resistance within and between plants. *Plant Cell* **29**, 1440-  
637 1459.
- 638 **Riemann, M., Haga, K., Shimizu, T., Okada, K., Ando, S., Mochizuki, S.,**  
639 **Nishizawa, Y., Yamanouchi, U., Nick, P., Yano, M., Minami, E., Takano, M.,**  
640 **Yamane, H., and Iino, M.** (2013). Identification of rice *Allene Oxide Cyclase*  
641 mutants and the function of jasmonate for defence against *Magnaporthe oryzae*.  
642 *Plant J.* **74**, 226-238.
- 643 **Schwessinger, B., Bahar, O., Thomas, N., Holton, N., Nekrasov, V., Ruan, D.,**  
644 **Canlas, P.E., Daudi, A., Petzold, C.J., Singan, V.R., Kuo, R., Chovatia, M.,**  
645 **Daum, C., Heazlewood, J.L., Zipfel, C., and Ronald, P.C.** (2015). Transgenic  
646 expression of the dicotyledonous pattern recognition receptor EFR in rice leads  
647 to ligand-dependent activation of defense responses. *PLoS Path.* **11**, e1004809.
- 648 **Segui-Simarro, J., Testillano, P., Jouannic, S., Henry, Y., and Risueno, M.** (2005).  
649 Mitogen-activated protein kinases are developmentally regulated during stress-  
650 induced microspore embryogenesis in *Brassica napus* L. *Histochem Cell Biol*  
651 **123**, 541-551.
- 652 **Shulaev, V., Silverman, P., and Raskin, I.** (1997). Airborne signalling by methyl  
653 salicylate in plant pathogen resistance. *Nature* **385**, 718-721.

- 654 **Singh, P., Kuo, Y.C., Mishra, S., Tsai, C.H., Chien, C.C., Chen, C.W., Desclos-**  
655 **Theveniau, M., Chu, P.W., Schulze, B., Chinchilla, D., Boller, T., and**  
656 **Zimmerli, L. (2012).** The lectin receptor kinase-VI.2 is required for priming  
657 and positively regulates *Arabidopsis* pattern-triggered immunity. *Plant Cell* **24**,  
658 1256-1270.
- 659 **Sugimoto, K., Matsui, K., Iijima, Y., Akakabe, Y., Muramoto, S., Ozawa, R.,**  
660 **Uefune, M., Sasaki, R., Alamgir, K.M., Akitake, S., Nobuke, T., Galis, I.,**  
661 **Aoki, K., Shibata, D., and Takabayashi, J. (2014).** Intake and transformation  
662 to a glycoside of (Z)-3-hexenol from infested neighbors reveals a mode of plant  
663 odor reception and defense. *Proc. Natl. Acad. Sci. USA* **111**, 7144-7149.
- 664 **Ton, J., D'Alessandro, M., Jourdie, V., Jakab, G., Karlen, D., Held, M., Mauch-**  
665 **Mani, B., and Turlings, T.C.J. (2007).** Priming by airborne signals boosts  
666 direct and indirect resistance in maize. *Plant J.* **49**, 16-26.
- 667 **Veyrat, N., Robert, C.A.M., Turlings, T.C.J., and Erb, M. (2016).** Herbivore  
668 intoxication as a potential primary function of an inducible volatile plant signal.  
669 *J. Ecol.* **104**, 591-600.
- 670 **Wang, H., Hao, J., Chen, X., Hao, Z., Wang, X., Lou, Y., Peng, Y., and Guo, Z.**  
671 **(2007).** Overexpression of rice WRKY89 enhances ultraviolet B tolerance and  
672 disease resistance in rice plants. *Plant Mol. Biol.* **65**, 799-815.
- 673 **Wang, Q., Li, J., Hu, L., Zhang, T., Zhang, G., and Lou, Y. (2013).** OsMPK3  
674 positively regulates the JA signaling pathway and plant resistance to a chewing  
675 herbivore in rice. *Plant Cell. Rep.* **32**, 1075-1084.
- 676 **Wu, J., Hettenhausen, C., Meldau, S., and Baldwin, I.T. (2007).** Herbivory rapidly  
677 activates MAPK signaling in attacked and unattacked leaf regions but not  
678 between leaves of *Nicotiana attenuata*. *Plant Cell* **19**, 1096-1122.
- 679 **Yara, A., Yaeno, T., Hasegawa, M., Seto, H., Seo, S., Kusumi, K., and Iba, K. (2008).**  
680 Resistance to *Magnaporthe grisea* in transgenic rice with suppressed expression  
681 of genes encoding allene oxide cyclase and phytodienoic acid reductase.  
682 *Biochem. Biophys. Res. Commun.* **376**, 460-465.
- 683 **Ye, M. (2016).** Functional characterization of receptor-like kinase genes *OsHI-RLK2*

684 and *OsHI-PSKR* in herbivore-induced defenses in rice. In Zhejiang University,  
685 China. (Hangzhou, China: Zhejiang University,), pp. 18-78.

686 **Ye, M., Veyrat, N., Xu, H., Hu, L., Turlings, T.C.J., and Erb, M.** (2018). An  
687 herbivore-induced plant volatile reduces parasitoid attraction by changing the  
688 smell of caterpillars. *Sci. Adv.* **4**, eaar4767.

689 **Zhou, G., Qi, J., Ren, N., Cheng, J., Erb, M., Mao, B., and Lou, Y.** (2009). Silencing  
690 *OsHI-LOX* makes rice more susceptible to chewing herbivores, but enhances  
691 resistance to a phloem feeder. *Plant J.* **60**, 638-648.

692

693

694 **Supplemental Data**

695

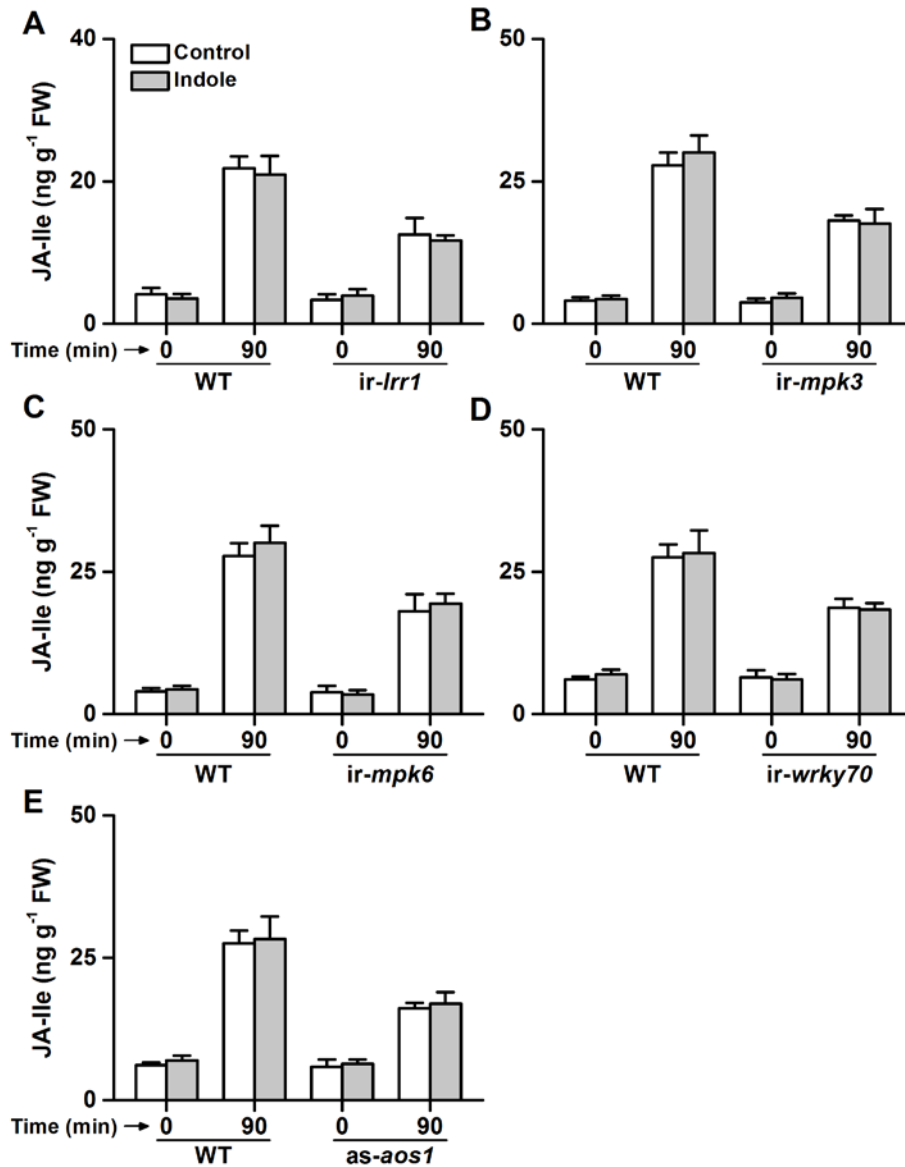

696

697 **Supplemental Figure 1. Herbivore-induced jasmonic acid-isoleucine (JA-Ile)**  
698 **levels in MPK, WRKY and JA-impaired plants after indole exposure.** Average  
699 concentrations of the herbivore-induced JA-Ile in in *ir-lrr1* (A), *ir-mpk3* (B), *ir-mpk6*  
700 (C), *ir-wrky70* (D), *as-aos1* (E) line and wild type (WT) plants that were pre-exposed  
701 to indole or control (+SE,  $n=6$ ). No significant was found between indole and control  
702 treatments at the indicated times. FW, fresh weight.

703



704 **Supplemental Table 1. Primers used for QRT-PCR of target genes.**

| Gene name         | TIGR ID                               | Forward primer (5'---3') | Reverse primer (5'---3')  |
|-------------------|---------------------------------------|--------------------------|---------------------------|
| <i>OsLRR-RLK1</i> | Os06g47650                            | GGCAAGGGAGGATCAAATAA     | AGCTTGGATCCATTGGGTAG      |
| <i>OsMPK3</i>     | Os03g17700                            | CGACTTCGAGCAGAAGGCTCTA   | GTTCACTCGATCGCTTCGTT      |
| <i>OsMPK6</i>     | Os06g06090                            | CGCACGCTCAGGGAGATC       | GGTATGATATCCCTTATGGCAACAA |
| <i>OsWRKY70</i>   | Os05g39720                            | CCGCTGCTGTTTTGATCATCT    | GGAGCTAAGCTAACTCACTCCACA  |
| <i>OsWRKY53</i>   | Os05g27730                            | AACGGCTGCTCCATGAAGAA     | TTGTGTGCGCCCTTG TAGAC     |
| <i>OsWRKY45</i>   | Os05g25770                            | GGGAATTCGGTGGTCGTCAA     | GAAGTAGGCCTTTGGGTGCT      |
| <i>OsWRKY33</i>   | Os03g33012                            | AGGCAAGCACAGCCATGAC      | GAAGACGATACGTTGGCATTAGC   |
| <i>OsWRKY30</i>   | Os08g38990                            | AACAGTGGCCACCCAAGCT      | G TTCAGGTCTCCGGTGAAGAAG   |
| <i>OsWRKY24</i>   | Os01g61080                            | AAGAGATGGAGGAAAGACGGTG   | TGTCGATGTCGCTCATGGTT      |
| <i>OsWRKY13</i>   | Os10g54600                            | GCGCAAGTACGGCCAGAA       | CCTTGGAGCTACTGCACCTGTA    |
| <i>OsHI-LOX</i>   | Os08g39840                            | CCGAGCTTGACGCGAAGA       | GATCGTCGTCGTCACATTGT      |
| <i>OsAOS1</i>     | Os03g55800                            | CGAGCTTTCCTCCGATACG      | GTCAGAAGGTGGCCTTCTTGAG    |
| <i>OsAOC</i>      | Os03g32314                            | TACGAGATCAACGAGCGCGACC   | TGTGGCCGTAGTCGCCGAAGTA    |
| <i>OsOPR3</i>     | Os08g35740                            | CCCATTAAGCTCGGCATGGCCGTT | CGTGTAGCCGCCACTGCACATGAA  |
| <i>OsJAR1</i>     | Os05g50890                            | AGGAGGCATCAAAGTTCCTGG    | CTCAGCTCCCAGAAGATCACG     |
| <i>OsACTIN</i>    | Os03g50885                            | TGGACAGGTTATCACCATTGGT   | CCGCAGCTTCCATTCCTATG      |
| <i>OsHI-RLK2</i>  | Genbank accession<br>no. XM_015757324 | CAGAGCTGCACATCAAGCTATGT  | AAGGGAAGAGATGAGAAGTTGAGC  |

705
